# Supplementary material
Source: Research Square preprint supplement (doi:10.21203/rs.3.rs-9695387/v1)
Supplement: Supplementary file 1 [file b8c5b2230e5bb562a40a114d.docx]

**Appendix A:**

*Interview Guide*

*For the purposes of understanding respondents, we first ask specialty, years of training, years of practice, age, and gender.*

1. Tell me about what you know about Rx Kids.
   1. If they say they do not know, we will thank them for their time and end the interview.
2. Tell me how it impacts patient care.
   1. Have you had patients who used it?
   2. How have you seen it address social determinants of health?
   3. How has it impacted your practice?
3. Tell me how it impacts your work as a healthcare worker.
   1. Does it impact how you feel about your work?
      1. How if in any way has it impacted burnout?
